# Supplementary material for: Feature tracking analysis of Bechung glacier dynamics using Landsat imagery: surface displacement and velocity assessment in Bhutan
Source: Research Square preprint supplement (doi:10.21203/rs.3.rs-7372007/v1), 2025-10-28

**Feature tracking analysis of Bechung glacier dynamics using Landsat imagery: surface displacement and velocity assessment in Bhutan**

Sonam Zangpo1, Jamyang Drugyel1, Reshma Rai1, Ugyen Dorji1, Thonley2, Sangay Gyeltshen3*

1Department of Civil Engineering and Surveying, Jigme Namgyel Engineering College, Royal University of Bhutan, 41002, Dewathang, Bhutan.

2School of Earth, Atmosphere and Environment, Faculty of Science, Monash University, Victoria 3800, Australia.

3*Department of Civil and Environmental Engineering, Graduate School of Engineering, Nagoya University, Aichi, 464-8603, Japan

**Corresponding Author***: Sangay Gyeltshen ([sangye89@gmail.com](mailto:sangye89@gmail.com); ORCID: <https://orcid.org/0000-0003-1566-0354>)

**Author’s email ID:** Sonam Zangpo ([sonamzangpo604@gmail.com](mailto:sonamzangpo604@gmail.com)), Jamgyang Drugyel ([yangyel7756@gmail.com](mailto:yangyel7756@gmail.com)), Reshma Rai ([rkhesang2000@gmail.com](mailto:rkhesang2000@gmail.com)), Ugyen Dorji ([ugyendorji910@gmail.com](mailto:ugyendorji910@gmail.com)), Thongley ([thongley@jnec.edu.bt](mailto:thongley@jnec.edu.bt))

**Supplementary Materials**

**Appendix A**: Schematic illustration of cross- and longitudinal section of Bechung glacier for velocity measurement

**Appendix B**: Schematic illustration of cross- and longitudinal section of Bechung glacier for thickness measurements


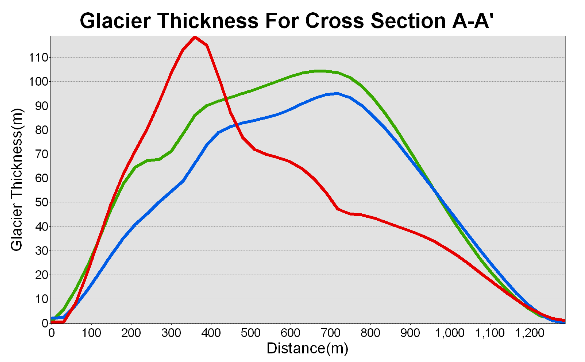

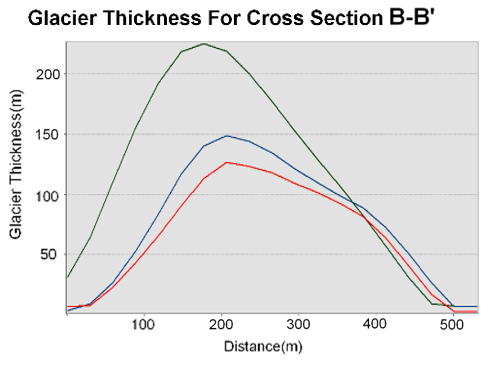

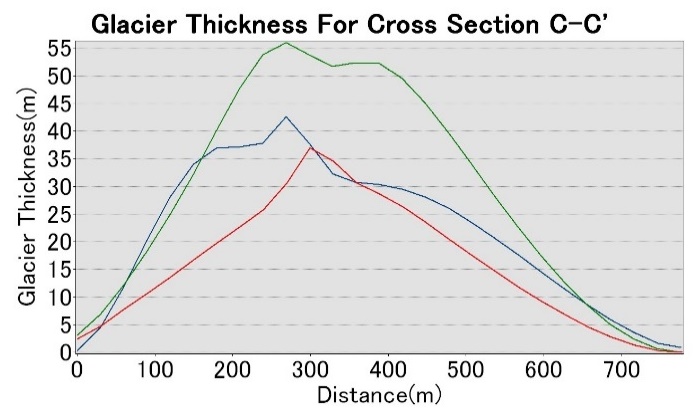

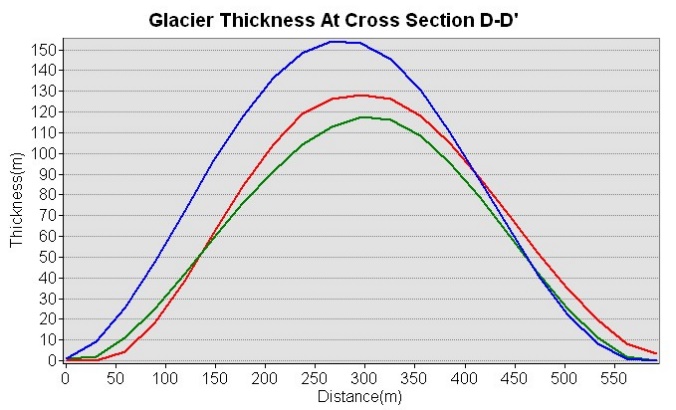


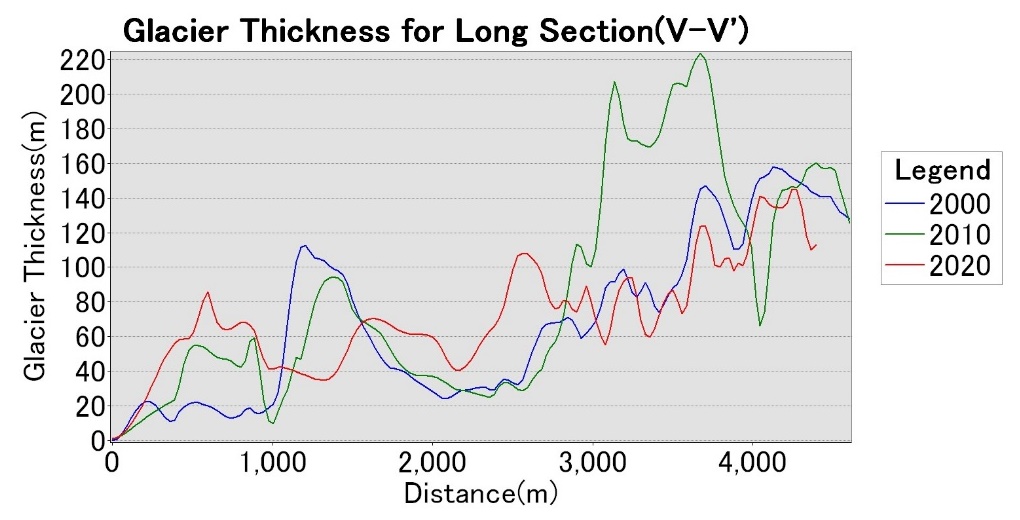

Supplement: Supplementary file 1 [file c2f1c031aae60f48b4c3c199.docx]
